# Supplementary material
Source: PubMed Central journal article supplement (PMC4195437)
Supplement: NIHMS632491-supplement-Supplement1.pdf [file NIHMS632491-supplement-Supplement1.pdf]

## Supplementary Appendix

This appendix has been provided by the authors to give readers additional information about their work.

Supplement to: DeBaun MR, Gordon M, McKinstry RC, et al. Controlled trial of transfusions for silent cerebral infarcts in sickle cell anemia. *N Engl J Med* 2014;371:699-710. DOI: 10.1056/NEJMoa1401731

**Supplementary Appendix**

Supplement to: DeBaun et al. Transfusion Trial for Silent Cerebral Infarcts in Sickle Cell Anemia

**Contents:**

|                            |        |
|----------------------------|--------|
| Collaborators              | Page 2 |
| Supplement to the methods  | Page 6 |
| Supplementary Tables S1-S3 | Page 7 |

Silent Cerebral Infarct Transfusion Trial in Sickle Cell Disease, DeBaun *et al.*

**Collaborators:**

**Additional Contributors:** We thank the following collaborators:

The Brody School of Medicine, Greenville, North Carolina - Mauro Grossi, MD (2004-2006), Philip E. Neff, MD (2006-2007), Charles Daeschner, MD (2007-2008); Case Western Reserve University, Cleveland, Ohio - Anthony Villella, MD (2005-2006), Connie Piccone, MD (2012-Current); Central Middlesex Hospital, London, England, Jo Howard, MD (2004), Michele Afif, MRCPCH, (2005), Kofi Anie, PhD (2004-2008); Children's National Medical Center, Washington, DC - Catherina Minniti, MD (2004-2008), Ana Burgos, MD (2008), Helge Hartung, MD (2008-2011); Hôpital Intercommunal de Créteil, Créteil, France, Françoise Bernaudin, MD (2003-Current); The Ohio State University, Columbus - Mark Ranalli, MD, (2004-2008); University of Arkansas, Little Rock - Suzanne Saccente, MD, (2003-2009); University of Mississippi Medical Center, Jackson - Rathi V. Iyer, MD, (2003-2013); Wake Forest School of Medicine, Winston-Salem, North Carolina - Hernan Sabio, MD (2006-2011).

**Site Coordinators:**

Ann & Robert H. Lurie Children's Hospital of Chicago/Northwestern University, Chicago, Illinois - Janice Rambow Beatty, RN, BSN (2003-Current), Katherine Bianchi, MBA, CCRP (2009-Current); Baylor College of Medicine, Houston, Texas - Bogdan Dinu, MD (2008-Current), Marlen Dinu, MD (2004-2008); The Brody School of Medicine, Greenville, North Carolina - Cynthia Brown, CCRP (2008-Current); Case Western Reserve University, Cleveland, Ohio - Mary DeBarr, RN, BSN (2003-Current); Central Middlesex Hospital, London, England - Annette Gilmore, PhD (2005-2010); Cincinnati Children's Hospital Medical Center, Cincinnati, Ohio - Tamara Nordheim, BSN, RN, CCRP (2006-Current); Children's Hospital of Philadelphia, Philadelphia, Pennsylvania - Ami Belmont, BA (2011-2012), Martha Brown, BS (2003-2009), Marjorie Friedman, BA (2010-2011), Vanessa Nixon, RN (2010), Jeff Olsen, BS, MSPH (2009-2010), Helen Stanley, BS (2013-Current), Hannah

Silent Cerebral Infarct Transfusion Trial in Sickle Cell Disease, DeBaun *et al.*

Ware, BA (2012-2013); Children's National Medical Center, Washington, DC - Barbara Speller-Brown, DNP, PNP-BC (2003-Current); Evelina Children's Hospital, St Thomas' Hospital National Health Service Trust, London, England - Helen Appleby Bsc Hons Nursing (2007- 2008), Sharon Nodoro, Bsc Hons Nursing (Apr 2012-Current), James Ogechukwu, BSc, MSc (2010-2011), Giselle Padmore-Penniston MSc Social Research, Bsc Hons Health and Social Care, Dip He Nursing, Dip He Sociology, Cert Social Sci (2008-2010), Sati Sahota, (2007-2008); Georgetown University Hospital, Washington, DC - Anjum Zaki, MD (2002-Current); Hospital for Sick Children, University of Toronto, Toronto, Canada - Manuela Merelles-Pulcini, RN, BScN, MSN (2003-Current), Nagina Parmar, MSc, PhD, CCRP (2003-2013); Riley Hospital for Children, Indiana University/Purdue University Indianapolis, Indianapolis, Indiana - Shannon Arango, CCRP (2012-Current), Anne Bubnick, CCRP (2007-Current), Cindy Davis, RN, BSN, CCRP (2007-2012); Johns Hopkins University, Baltimore, Maryland - Elizabeth Dackiw, RN (2003-2011), (Phillip Seaman, 2011-2012), Paul Kamate, MD (2012-current), Devin Muntz, BA (2012-2013), Phillip Seaman , PA (2003-2012); Medical College of Wisconsin, Milwaukee, Wisconsin - Danielle Jirovec, MS (2008-2010), Sylvia Torres, MPH (2010-Current); The Ohio State University, Columbus, Ohio - Dianna Hidalgo, CCRC, CCRP (2012-Current), Kami Perdue, CCRP (2004-2012); Royal London Hospital, Barts Health NHS Trust, London, England – Kim Newell, RGN, RSCN, BSc (Hons), MSc (2003-Current); St. Louis Children's Hospital, Washington University School of Medicine, St. Louis, Missouri - Tinishia Greene (2011-Current), Cindy Terrill, CCRP (2003-2011); Sinai Hospital, Baltimore, Maryland - Joan Marasciulo, BSN, RN, CPON (2003-Current); University of Alabama at Birmingham, Birmingham, Alabama - Mary Jones, RN (2003-Current); University of Arkansas, Little Rock, Arkansas - Angela Mull (2003); University of Mississippi Medical Center, Jackson, Mississippi - Kimberly Gross, RN, (2007-Current); Children's Mercy Hospital, University of Missouri, Kansas City, Missouri - Ann Mehrhof, RN, MSN, CCRC (2009-Current) Susan Sarcone, RN, MSN, CPNP (2003-Current); University of North Carolina, Chapel Hill, North Carolina - Ruth Baldwin, MD (2003-2013), David Wichlan, MS (2013-Current), Fran Wright, CPNP (2003-2012), Elizabeth Robinson (2012-current); RN,

Silent Cerebral Infarct Transfusion Trial in Sickle Cell Disease, DeBaun *et al.*

MSN, CPNP); UT Southwestern Medical Center, Dallas, Texas - Michael Henson, BA, CCRC (2003-Current); Wake Forest School of Medicine, Winston-Salem, North Carolina - Jacqueline Davis, RN, CPNP (2007-Current), Judy Gillespie, (2006-2007); Wayne State University, Detroit, Michigan - Anish Abrol (2012), Cynthia Burnett, MS (2005-2012), Charmaine Williams-Farr, MA (2006-Current).

**Operations Committee:** Michael DeBaun, MD, MPH (PI, Chair), James F. Casella, MD (Vice Chair), Mae Gordan, PhD, J. Phillip Miller, Patricia Morris, Leonard Haertter, Dionna O. Roberts, MPH, MS, Teresa Roediger, CCRP, CCRM, Brittany Covert, MPH

**Neurology Committee:** Michael Dowling, MD, PhD, MSCS, Deborah Hirtz, MD, Rebecca Ichord, MD, Michael J Noetzel, MD (Chair), E Steve Roach, MD.

**Neuroradiology Committee:** William Ball Jr, MD, Michael Kraut, MD, PhD, Robert McKinstry, MD, PhD (Chair).

**Neuropsychology Committee:** T David Elkin, PhD, Mary George, PhD, Kevin Krull, PhD, Kimberly Rennie, PhD, H Gerry Taylor, PhD, Desiree A White, PhD (Chair).

**Advisory Committee:** Robert Adams, MS, MD, Yuko Palesch, PhD, William Powers, MD (Chair), Jeffrey Schatz, PhD.

**Data Safety and Monitoring Board:** Tom Adamkiewicz, MD, Stephen Ashwal, MD, Janice Cordell, RN, MPH, H Stacy Nicholson, MD, MPH, David Schoenfeld (Chair), PhD, Guillaume Sébire, MD.

Silent Cerebral Infarct Transfusion Trial in Sickle Cell Disease, DeBaun *et al.*

**Medical Monitor:** Andrew Campbell, MD.

**Statistical Data Coordinating Centers:**

**Washington University School of Medicine** (From 5/28/2010): Noor Al-Hammadi, MPH, Kevan Essmyer, Mae Gordon, PhD, Leonard Haertter, J Philip Miller, Patricia Morris, Robin Woltman (2010), Ningying Wu.

**Maryland Medical Research Institute, Inc** (Prior to 5/28/2010): Bruce Barton, PhD, Adrienne Brandon, CCRP, William McCarthy, PhD, Paul Canner, PhD, Michael Terrin, MD.

**Clinical Coordinating Center:**

**Washington University School of Medicine:** Lillie Beal (2003-2010), Brittany V Covert, MPH (2009-2010), Michael DeBaun, MD, MPH (2003-2010), Dionna O Roberts, MPH, MS(2009-2010), Teresa Roediger, CCRP (2008-Current), Sumit Som (2007-2009), Cindy Terrill, CCRP (2003-2011).

**Vanderbilt University School of Medicine:** (From 11/1/2010-Current): Brittany V Covert, MPH, Michael DeBaun, MD, MPH, Derwin Gray II (2011-2012), Mustafa Nateqi, MBA, and Dionna O Roberts, MPH, MS.

**Electronic Radiology Laboratory:**

**Mallinckrodt Institute of Radiology at Washington University School of Medicine:** Paul Commean, Joan Moulton, Fred Prior, PhD, Bruce Vendt, MBA, Mary Wolfsberger.

**Supplement to Methods:**

M. DeBaun (Chair, PI), designed the SIT Trial, after completion of a feasibility trial<sup>11</sup> and in conjunction with J. Casella (Vice Chair, co-PI) and other members of the Executive Committee (R. McKinstry, D. White, M. Noetzel, R. Ichord, D. Hirtz), and members of the initial Data Coordinating Center for the SIT Trial (M. Terrin and B. Barton of the Maryland Medical Research Institute). The data in the trial was gathered by the site investigators and research coordinators at each participating site. Data collected by the research coordinators at each site was overseen by the site Principal Investigators. At least one site visit was conducted by M. DeBaun, J. Casella, or J. Strouse and often a second site visit was conducted by M. DeBaun with research coordinators to review the quality of the data and research governance documents pertaining to the trial. Data was collected and entered into a REDCap database specifically designed for the SIT Trial and monitored for accuracy and completion by the Data and Statistical Coordinating Center of the SIT Trial located at Washington University School of Medicine in St. Louis and the Clinical Coordinating Center located at Vanderbilt University School of Medicine. M. DeBaun and M. Gordon, analyzed the data and vouch for the data and analyses. M. DeBaun wrote the first draft with statistical analysis input and review from M. Gordon and J. P. Miller. Review and editing of the manuscript was completed by members of the Executive Committee. Members of the Executive Committee and the site investigators made the decision to publish this paper.

*Statistics*

In 2010 the DSMB approved a reduction in sample size to 196, given a lower than predicted dropout rate and no expected loss in statistical power.

**Supplemental Tables:**

**Table S1. Intention to treat analysis.** - Comparison between randomization groups on changes in Wechsler Abbreviated Scale of Intelligence (WASI) performance, verbal, and full IQ score from baseline to interim and to exit visits with estimated least squares means (LSM) and based on two-way repeated measures analysis of variance.

| WASI           | Group       | Time     |      |         |        |       |         |      |         |        |       |      |      |         |        |       |
|----------------|-------------|----------|------|---------|--------|-------|---------|------|---------|--------|-------|------|------|---------|--------|-------|
|                |             | Baseline |      |         |        |       | Interim |      |         |        |       | Exit |      |         |        |       |
|                |             | N        | LSM  | Std Err | 95% CI |       | N       | LSM  | Std Err | 95% CI |       | N    | LSM  | Std Err | 95% CI |       |
|                |             |          |      |         | Lower  | Upper |         |      |         | Lower  | Upper |      |      |         | Lower  | Upper |
| Performance IQ | Observation | 86       | 92.6 | 1.4     | 89.9   | 95.3  | 71      | 93.7 | 1.4     | 90.9   | 96.5  | 80   | 94.9 | 1.4     | 92.2   | 97.7  |
|                | Transfusion | 86       | 91.0 | 1.4     | 88.3   | 93.6  | 80      | 93.9 | 1.4     | 91.1   | 96.6  | 86   | 92.3 | 1.4     | 89.6   | 94.9  |
| Verbal IQ      | Observation | 87       | 96.8 | 1.5     | 93.8   | 99.8  | 71      | 98.7 | 1.6     | 95.6   | 101.8 | 80   | 97.5 | 1.5     | 94.5   | 100.6 |
|                | Transfusion | 85       | 93.2 | 1.5     | 90.2   | 96.1  | 80      | 94.3 | 1.5     | 91.3   | 97.3  | 87   | 92.0 | 1.5     | 89.1   | 95.0  |
| Full IQ        | Observation | 86       | 94.1 | 1.4     | 91.4   | 96.8  | 71      | 95.7 | 1.4     | 92.9   | 98.4  | 80   | 95.7 | 1.4     | 93.0   | 98.4  |
|                | Transfusion | 85       | 91.2 | 1.4     | 88.6   | 93.9  | 80      | 93.4 | 1.4     | 90.7   | 96.1  | 86   | 91.2 | 1.4     | 88.5   | 93.8  |

|                | Baseline to Interim                                              |        |       |         | Baseline to Exit                                                 |        |       |         |
|----------------|------------------------------------------------------------------|--------|-------|---------|------------------------------------------------------------------|--------|-------|---------|
|                | Between Group (Transfusion vs. Observation) Difference in Change | 95% CI |       | p-value | Between Group (Transfusion vs. Observation) Difference in Change | 95% CI |       | p-value |
|                |                                                                  | Lower  | Upper |         |                                                                  | Lower  | Upper |         |
| Performance IQ | -1.8                                                             | -4.7   | 1.2   | 0.2     | 1.1                                                              | -1.9   | 4.0   | 0.5     |
| Verbal IQ      | 0.7                                                              | -2.6   | 4.1   | 0.7     | 1.9                                                              | -1.4   | 5.1   | 0.3     |
| Full IQ        | -0.6                                                             | -3.4   | 2.2   | 0.7     | 1.7                                                              | -1.1   | 4.4   | 0.2     |

Note:

1. Non-significant interaction term suggested that there is no difference between observation and transfusion groups with respect to the IQ changes from baseline to interim and exit visits.
2. Data is analyzed by randomization assignment; cross-overs are ignored.
3. In total, 171 subjects at baseline, 151 subjects at interim, and 166 subjects at exit have Full IQ scores which are the sum of T scores of four subscale, Vocabulary, Similarities, Matrix, and Block. Full IQ score cannot be calculated if there is missing data in the subscales.

Intelligence Quotient (IQ)  
 Number (N)  
 Standard Error (Std Err)



**Table S2. Intention to treat analysis.** - Comparison between randomization groups on changes in Behavior Rating Inventory of Executive Functioning (BRIEF) subtests from baseline to interim and to exit visits with estimated least squares means (LSM) based on two-way repeated measures of analysis of variance.

| BRIEF Subtests | Group       | Time     |      |         |        |       |         |      |         |        |       |      |      |         |        |       |
|----------------|-------------|----------|------|---------|--------|-------|---------|------|---------|--------|-------|------|------|---------|--------|-------|
|                |             | Baseline |      |         |        |       | Interim |      |         |        |       | Exit |      |         |        |       |
|                |             | N        | LSM  | Std Err | 95% CI |       | N       | LSM  | Std Err | 95% CI |       | N    | LSM  | Std Err | 95% CI |       |
|                |             |          |      |         | Lower  | Upper |         |      |         | Lower  | Upper |      |      |         | Lower  | Upper |
| Inhibit        | Observation | 87       | 52.2 | 1.2     | 49.9   | 54.6  | 73      | 51.7 | 1.3     | 49.2   | 54.2  | 81   | 51.9 | 1.2     | 49.5   | 54.3  |
|                | Transfusion | 88       | 51.9 | 1.2     | 49.6   | 54.3  | 79      | 52.1 | 1.2     | 49.6   | 54.5  | 86   | 52.4 | 1.2     | 50.0   | 54.7  |
| Shift          | Observation | 87       | 53.2 | 1.2     | 50.9   | 55.5  | 73      | 54.0 | 1.3     | 51.5   | 56.4  | 78   | 53.7 | 1.2     | 51.3   | 56.1  |
|                | Transfusion | 88       | 53.5 | 1.2     | 51.2   | 55.8  | 80      | 53.4 | 1.2     | 51.0   | 55.7  | 87   | 52.4 | 1.2     | 50.0   | 54.7  |
| Control        | Observation | 87       | 53.8 | 1.3     | 51.3   | 56.2  | 73      | 53.2 | 1.3     | 50.6   | 55.8  | 81   | 52.0 | 1.3     | 49.4   | 54.5  |
|                | Transfusion | 88       | 54.4 | 1.2     | 52.0   | 56.9  | 79      | 52.9 | 1.3     | 50.3   | 55.4  | 86   | 53.2 | 1.3     | 50.7   | 55.6  |
| BR             | Observation | 87       | 53.4 | 1.2     | 51.0   | 55.9  | 73      | 53.2 | 1.3     | 50.6   | 55.8  | 80   | 52.7 | 1.3     | 50.2   | 55.2  |
|                | Transfusion | 87       | 53.6 | 1.2     | 51.2   | 56.1  | 79      | 53.0 | 1.3     | 50.5   | 55.5  | 88   | 53.4 | 1.2     | 50.9   | 55.8  |
| Initiate       | Observation | 87       | 53.6 | 1.1     | 51.4   | 55.8  | 73      | 53.2 | 1.2     | 50.8   | 55.5  | 81   | 53.0 | 1.2     | 50.7   | 55.3  |
|                | Transfusion | 88       | 51.9 | 1.1     | 49.7   | 54.1  | 79      | 53.0 | 1.2     | 50.7   | 55.3  | 85   | 51.9 | 1.1     | 49.6   | 54.1  |
| Memory         | Observation | 87       | 57.4 | 1.3     | 54.8   | 59.9  | 73      | 57.3 | 1.4     | 54.6   | 59.9  | 81   | 56.5 | 1.3     | 53.9   | 59.1  |
|                | Transfusion | 88       | 57.0 | 1.3     | 54.5   | 59.6  | 80      | 56.9 | 1.3     | 54.3   | 59.5  | 87   | 56.7 | 1.3     | 54.2   | 59.3  |
| Plan           | Observation | 87       | 54.9 | 1.2     | 52.6   | 57.3  | 73      | 54.3 | 1.3     | 51.8   | 56.8  | 81   | 53.0 | 1.2     | 50.6   | 55.5  |
|                | Transfusion | 86       | 54.3 | 1.2     | 51.9   | 56.6  | 80      | 55.6 | 1.2     | 53.2   | 58.1  | 86   | 53.8 | 1.2     | 51.4   | 56.2  |
| Organization   | Observation | 86       | 51.5 | 1.0     | 49.4   | 53.5  | 73      | 51.8 | 1.1     | 49.7   | 53.9  | 81   | 52.0 | 1.1     | 49.9   | 54.0  |
|                | Transfusion | 88       | 51.2 | 1.0     | 49.2   | 53.2  | 79      | 50.6 | 1.1     | 48.6   | 52.7  | 85   | 50.7 | 1.0     | 48.7   | 52.8  |
| Monitor        | Observation | 86       | 51.5 | 1.2     | 49.2   | 53.8  | 73      | 51.9 | 1.2     | 49.5   | 54.3  | 81   | 51.5 | 1.2     | 49.2   | 53.8  |
|                | Transfusion | 87       | 51.0 | 1.2     | 48.8   | 53.3  | 80      | 51.8 | 1.2     | 49.5   | 54.2  | 87   | 52.1 | 1.2     | 49.8   | 54.3  |
| MT             | Observation | 87       | 54.5 | 1.2     | 52.2   | 56.9  | 73      | 54.6 | 1.2     | 52.1   | 57.1  | 80   | 53.9 | 1.2     | 51.5   | 56.3  |
|                | Transfusion | 87       | 53.7 | 1.2     | 51.4   | 56.1  | 80      | 54.5 | 1.2     | 52.1   | 56.9  | 88   | 53.4 | 1.2     | 51.1   | 55.8  |
| GEC            | Observation | 87       | 54.5 | 1.2     | 52.1   | 56.9  | 73      | 54.3 | 1.3     | 51.8   | 56.8  | 81   | 53.6 | 1.2     | 51.1   | 56.0  |
|                | Transfusion | 87       | 54.0 | 1.2     | 51.6   | 56.4  | 80      | 54.2 | 1.2     | 51.8   | 56.7  | 88   | 53.7 | 1.2     | 51.3   | 56.1  |

| BRIEF Subtests | Baseline to Interim                                              |        |       |         |                                                                  | Baseline to Exit |       |         |  |  |
|----------------|------------------------------------------------------------------|--------|-------|---------|------------------------------------------------------------------|------------------|-------|---------|--|--|
|                | Between Group (Transfusion vs. Observation) Difference in Change | 95% CI |       | p-value | Between Group (Transfusion vs. Observation) Difference in Change | 95% CI           |       | p-value |  |  |
|                |                                                                  | Lower  | Upper |         |                                                                  | Lower            | Upper |         |  |  |
| Inhibit        | -0.6                                                             | -3.7   | 2.5   | 0.7     | -0.7                                                             | -3.7             | 2.3   | 0.6     |  |  |
| Shift          | 0.9                                                              | -2.4   | 4.1   | 0.6     | 1.6                                                              | -1.6             | 4.8   | 0.3     |  |  |
| Control        | 1.0                                                              | -2.4   | 4.3   | 0.6     | -0.6                                                             | -3.8             | 2.7   | 0.7     |  |  |
| BR             | 0.4                                                              | -2.7   | 3.6   | 0.8     | -0.5                                                             | -3.5             | 2.6   | 0.8     |  |  |
| Initiate       | -1.5                                                             | -4.4   | 1.4   | 0.3     | -0.6                                                             | -3.4             | 2.3   | 0.7     |  |  |
| Memory         | 0.0                                                              | -3.0   | 3.0   | 1.0     | -0.5                                                             | -3.4             | 2.5   | 0.7     |  |  |
| Plan           | -2.0                                                             | -4.9   | 0.9   | 0.2     | -1.4                                                             | -4.2             | 1.4   | 0.3     |  |  |
| Organization   | 0.9                                                              | -1.8   | 3.6   | 0.5     | 1.0                                                              | -1.6             | 3.6   | 0.5     |  |  |
| Monitor        | -0.4                                                             | -3.5   | 2.6   | 0.8     | -1.0                                                             | -4.0             | 2.0   | 0.5     |  |  |
| MT             | -0.7                                                             | -3.3   | 2.0   | 0.6     | -0.3                                                             | -2.9             | 2.3   | 0.8     |  |  |

Silent Cerebral Infarct Transfusion Trial in Sickle Cell Disease, DeBaun *et al.*

|     |      |      |     |     |      |      |     |     |
|-----|------|------|-----|-----|------|------|-----|-----|
| GEC | -0.4 | -3.1 | 2.3 | 0.8 | -0.6 | -3.2 | 2.0 | 0.7 |
|-----|------|------|-----|-----|------|------|-----|-----|

Note: Non-significant interaction term suggested that there is no difference between observation and transfusion groups with respect to the BRIEF changes from baseline to interim and to exit visits. Additionally, data is analyzed by randomization assignment; cross-overs are ignored.

- Intelligence Quotient (IQ)
- Number (N)
- Standard Error (Std Err)
- 95% Confidence Interval (95% CI)
- Behavioral Regulation (BR)
- Metacognition (MT)
- Global Executive Composite (GEC)

| <b>Table S3. Odds Ratio of Baseline Factors for Primary Endpoint (Stroke, New or Enlarged Silent Cerebral Infarction)</b> |                        |                        |                          |                          |         |
|---------------------------------------------------------------------------------------------------------------------------|------------------------|------------------------|--------------------------|--------------------------|---------|
|                                                                                                                           | Primary Endpoint       |                        | Unadjusted               | Adjusted                 | P Value |
|                                                                                                                           | Yes<br>(N=20)<br>N (%) | No<br>(N=176)<br>N (%) | OR<br>(95% LCL, 95% UCL) | OR<br>(95% LCL, 95% UCL) |         |
| Randomization Group                                                                                                       |                        |                        |                          |                          |         |
| Observation (N=97)                                                                                                        | 14 (14.4)              | 83 (85.6)              | ref                      |                          |         |
| Transfusion (N=99)                                                                                                        | 6 (6.1)                | 93 (93.9)              | 0.38 (0.14, 1.04)        | 0.31 (0.10, 0.93)        | 0.04    |
| Characteristics                                                                                                           |                        |                        |                          |                          |         |
| Sex                                                                                                                       |                        |                        |                          |                          |         |
| Male                                                                                                                      | 11 (9.9)               | 100 (90.1)             | 0.93 (0.37, 2.35)        |                          |         |
| Female                                                                                                                    | 9 (10.6)               | 76 (89.4)              | ref                      |                          |         |
| Parental report of recurring headaches                                                                                    |                        |                        |                          |                          |         |
| Yes                                                                                                                       | 13 (16.3)              | 67 (83.8)              | 3.02 (1.15, 7.95)        | 4.43 (1.50, 13.06)       | 0.007   |
| No                                                                                                                        | 7 (6.0)                | 109 (94.0)             | ref                      |                          |         |
|                                                                                                                           | <b>Median (IQR**)</b>  | <b>Median (IQR)</b>    |                          |                          |         |
| Age at Randomization – yr.                                                                                                | 7.8 (6.8, 9.2)         | 10.2 (8.0, 12.1)       | 1.40 (1.12, 1.75)        | 1.41 (1.12, 1.78)        | 0.004   |
| TCD Velocity during screening (cm/sec)*                                                                                   | 153 (136.5, 164.5)     | 145 (128.0, 165.0)     | 1.01 (0.99, 1.03)        |                          |         |
| Rate of Hospital Admissions for Pain†<br>(per 100 person years)                                                           | 33.3 (0.0, 100.0)      | 33.3 (0.0, 100.0)      | 1.00 (0.99, 1.01)        |                          |         |
| Rate of Hospital Admissions for ACS†<br>(per 100 person years)                                                            | 0.0 (0.0, 16.7)        | 0.0 (0.0, 33.3)        | 0.99 (0.98, 1.01)        |                          |         |
| Steady state hemoglobin (g/dl)                                                                                            | 7.8 (7.1, 8.2)         | 7.8 (7.3, 8.6)         | 0.91 (0.58, 1.41)        |                          |         |
| Hemoglobin F (%)‡                                                                                                         | 9.5 (4.0, 17.5)        | 9.0 (5.0, 14.5)        | 1.00 (0.94, 1.06)        |                          |         |
| Steady state reticulocytes (%)                                                                                            | 12.1 (10.7, 16.2)      | 10.8 (8.2, 14.8)       | 1.06 (0.98, 1.16)        | 1.11 (1.01, 1.22)        | 0.038   |
| Steady state WBC (count/ microL) ×10 <sup>3</sup>                                                                         | 13.1 (11.2, 17.8)      | 12.1 (10.0, 14.4)      | 1.01 (0.96, 1.05)        |                          |         |
| Steady state platelets (K/ cu mm) 10 <sup>3</sup> §                                                                       | 455.0 (320.0, 520.0)   | 431.5 (370.0, 502.5)   | 1.01 (0.73, 1.40)        |                          |         |
| Blood pressure – systolic (mmHg)                                                                                          | 107.0 (100.5, 109.5)   | 108.5 (102.5, 116.0)   | 0.97 (0.93, 1.01)        |                          |         |
| Oximetry reading (%)                                                                                                      | 96.0 (94.5, 98.0)      | 97.0 (94.0, 99.0)      | 0.99 (0.84, 1.17)        |                          |         |

Note: Odds ratios were computed using multiple imputations in stepwise logistic regression and a significance level of 0.1 was required to allow a variable into the model, and a significance level of 0.15 was required for a variable to stay in the model.

\* Fifteen points were added to results of imaging TCD to standardize the unit to non-imaging TCD result.

\*\* Interquartile range

† The mean for the rate for of hospital admissions for pain in the primary endpoint group is 71.7 vs. 64.8 in the non-endpoint group. The mean for the rate of hospital admissions for ACS was 15.0 in the primary endpoint group vs. 18.2 in the non-endpoint group.

‡ Type F % at baseline was set to missing if type F % was done prior to 3 years of age or the type F % date was missing and the age at the time of the test could not be computed.

§ Platelet count was divided by 1000.
